# Supplementary material for: A Human-Centered Platform for HIV Infection Reduction in New York: Development and Usage Analysis of the Ending the Epidemic (ETE) Dashboard
Source: PubMed Central journal article supplement (PMC5742657; doi:10.2196/publichealth.8312), 2017-12-11
Supplement: publichealth_v3i4e95_app1.pdf [file publichealth_v3i4e95_app1.pdf]

## Map the Epidemic

NYS HIV/AIDS prevalence by county, 2013  
Rate per 100,000

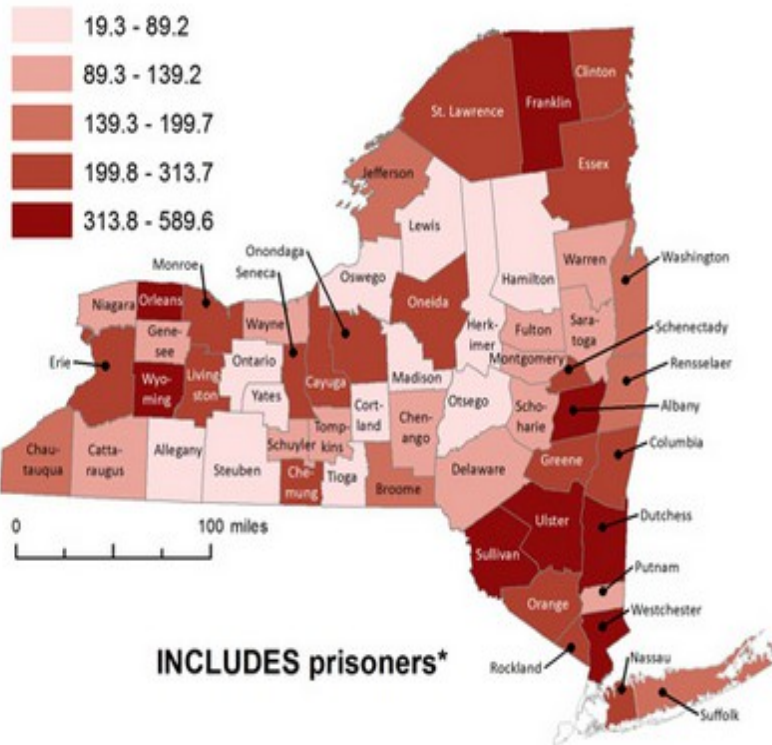

## HIV Care Cascades

### New York State Cascade of HIV Care, 2014

Persons Residing in NYS<sup>†</sup> at End of 2014

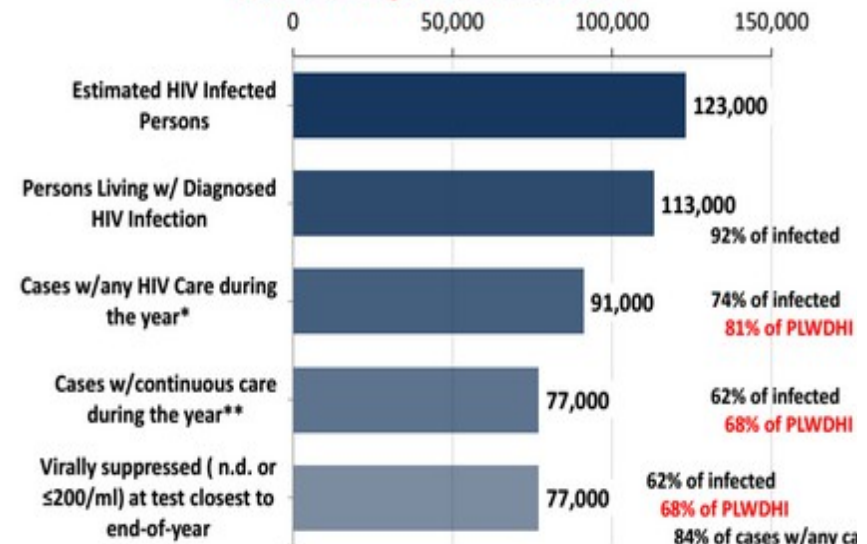

\* Any VL or CD4 test during the year; \*\* At least 2 tests, at least 3 months apart

<sup>†</sup>Based on a most recent address, regardless of where diagnosed. Excludes persons with AIDS with no evidence of care for 5 years and persons with diagnosed HIV (non-AIDS) with no evidence of care for 8 years.

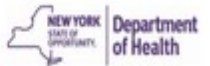

Explore
