# Supplementary material for: A Human-Centered Platform for HIV Infection Reduction in New York: Development and Usage Analysis of the Ending the Epidemic (ETE) Dashboard
Source: PubMed Central journal article supplement (PMC5742657; doi:10.2196/publichealth.8312), 2017-12-11
Supplement: publichealth_v3i4e95_app2.pdf [file publichealth_v3i4e95_app2.pdf]

## HIV TESTING NYC

34%

NYC residents tested in last 12 months (2013)

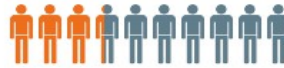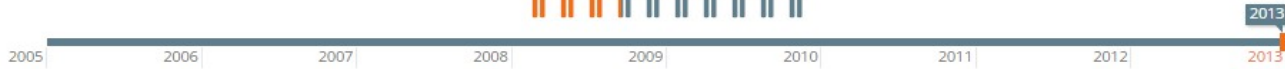

**Select HIV testing indicator:**

- Tested in last 12 months
- Never Tested
- Tested among MSM
- Never Tested among MSM

**Filters**

SEX:  
Total

RACE:  
Total

AGE:  
Total

[Reset Filters](#)

**Highlight By Location**

Search UHF name and zip code

- West Queens
- 2013

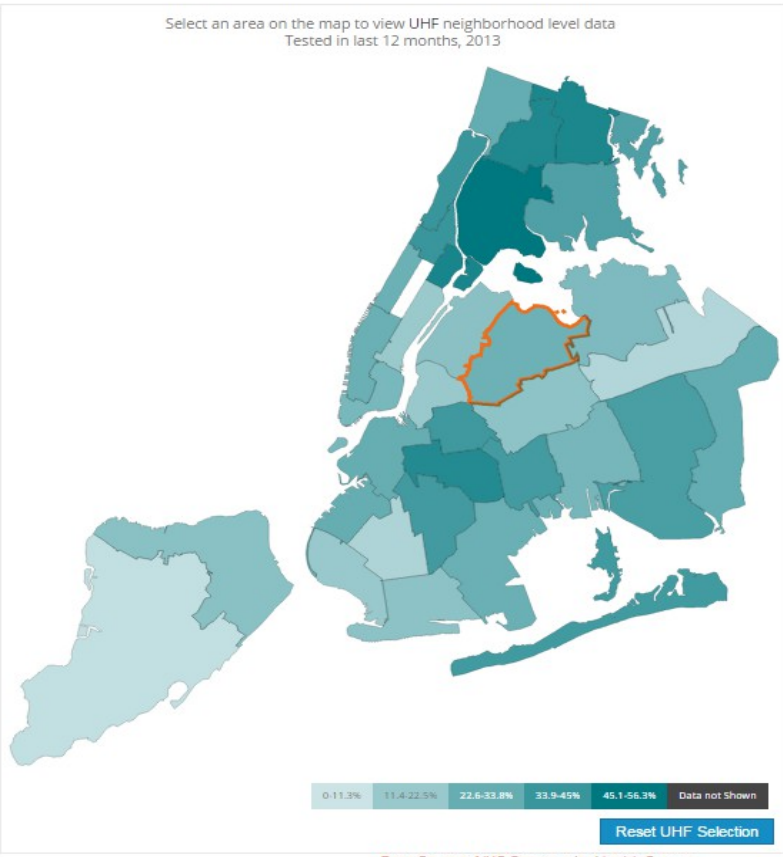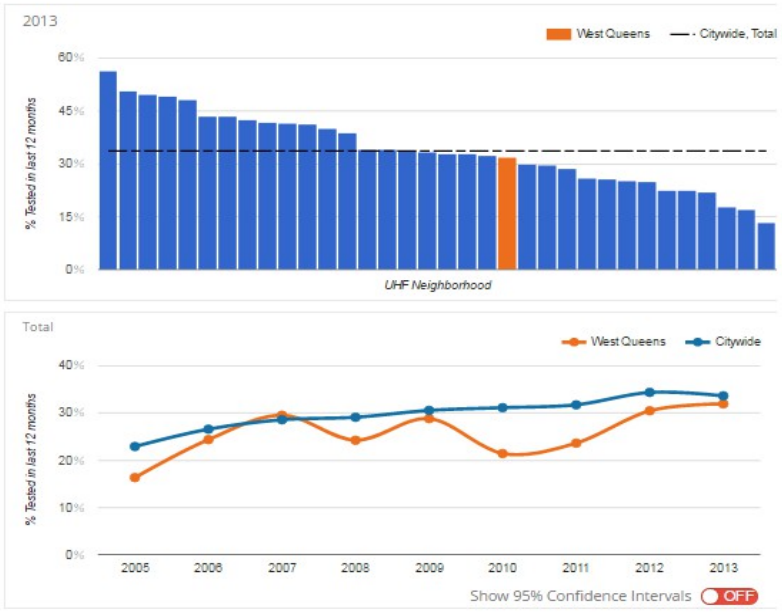

Data Source: NYC Community Health Survey  
All estimates are age-adjusted to the year 2000 U.S. Census
