# Supplementary material for: A Human-Centered Platform for HIV Infection Reduction in New York: Development and Usage Analysis of the Ending the Epidemic (ETE) Dashboard
Source: PubMed Central journal article supplement (PMC5742657; doi:10.2196/publichealth.8312), 2017-12-11

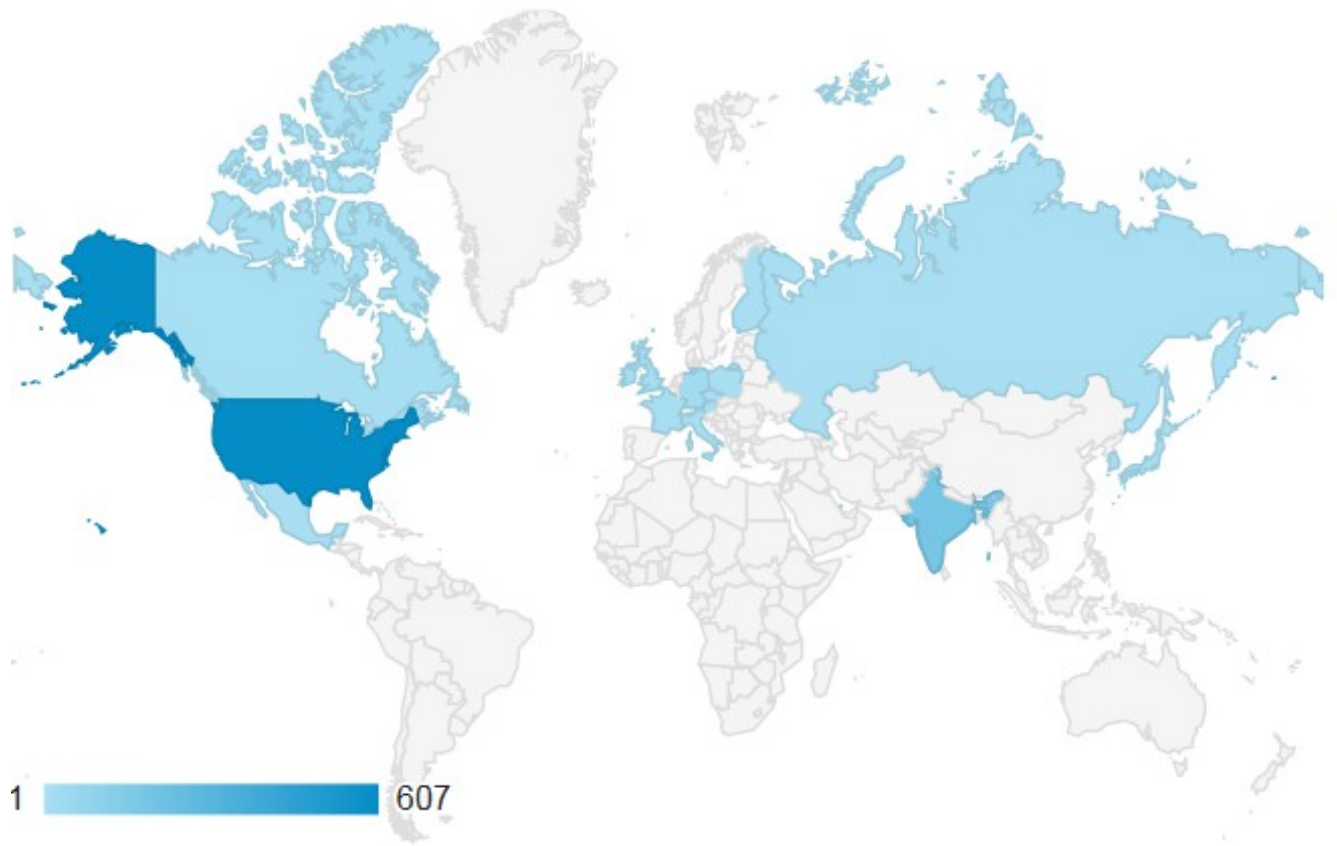

Supplement: publichealth_v3i4e95_app3.pdf [file publichealth_v3i4e95_app3.pdf]
