# Supplementary material for: A Human-Centered Platform for HIV Infection Reduction in New York: Development and Usage Analysis of the Ending the Epidemic (ETE) Dashboard
Source: PubMed Central journal article supplement (PMC5742657; doi:10.2196/publichealth.8312), 2017-12-11
Supplement: publichealth_v3i4e95_app4.pdf [file publichealth_v3i4e95_app4.pdf]

## Top landing page

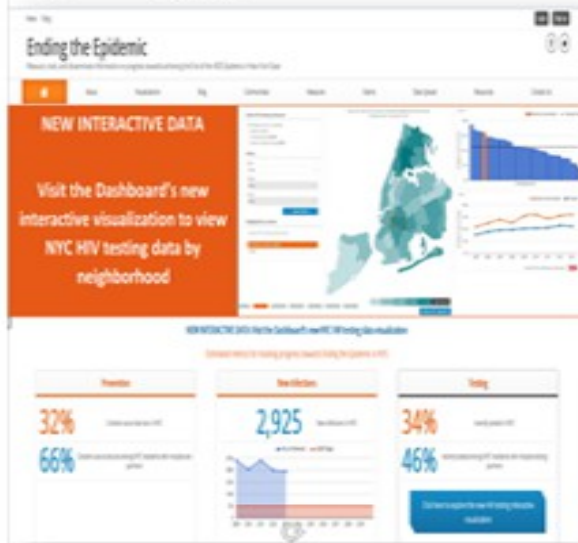

Page source: "Home"  
Page link: <http://etedashboardny.org/>  
Page bounce rate: 49%  
Average duration on page: 3mins 26secs

## Top transition page

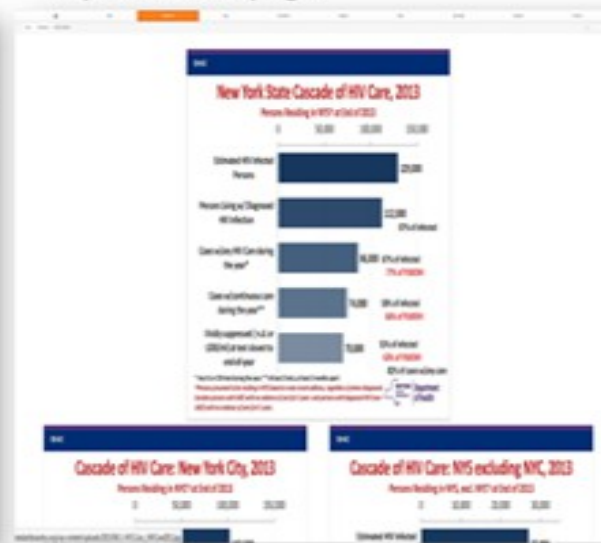

Page source: "HIV care cascades"  
Page link: <http://etedashboardny.org/visualizations/hiv-care-cascades/>  
Page bounce rate: 47%  
Average duration on page: 15mins 16secs

## Top exit page

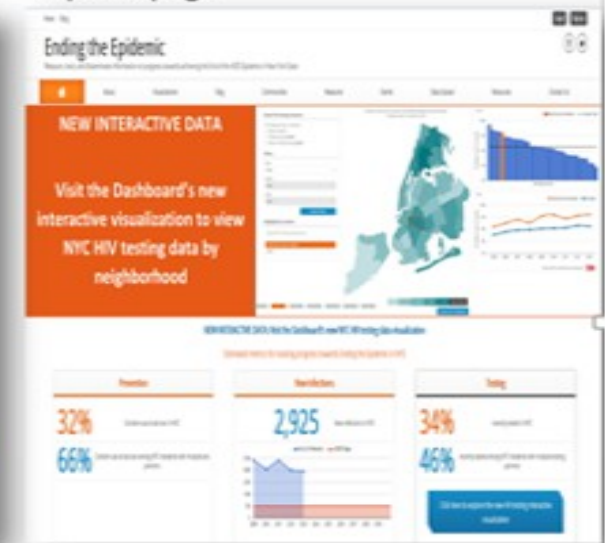

Page source: "Home"  
Page link: <http://etedashboardny.org/>  
Page bounce rate: 49%  
Average duration on page: 3mins 26secs
